# Supplementary material for: Microglia Signaling Pathway Reporters Unveiled Manganese Activation of the Interferon/STAT1 Pathway and Its Mitigation by Flavonoids
Source: PubMed Central journal article supplement (PMC10293393; doi:10.1007/s12035-023-03369-w), 2023-05-04
Supplement: 12035_2023_3369_MOESM1_ESM.pdf [file 12035_2023_3369_MOESM1_ESM.pdf]

Supporting Information to

**Manganese elicited activation of the STAT1 in microglia with the interferon signaling pathway reporters can be mitigated by flavonoids.**

Valeri V. Mossine<sup>1,2\*</sup>, James K. Waters<sup>2</sup>, Grace Y. Sun<sup>1</sup>, Zezong Gu<sup>3</sup>, and Thomas P. Mawhinney<sup>1,2,4</sup>

<sup>1</sup>*Department of Biochemistry, University of Missouri, Columbia, MO 65211, U.S.A.*

<sup>2</sup>*Agriculture Experiment Station Chemical Laboratories, University of Missouri, Columbia, MO 65211, U.S.A.*

<sup>3</sup>*Department of Pathology and Anatomical Sciences, University of Missouri, Columbia, MO 65211, U.S.A.*

<sup>4</sup>*Department of Child Health, University of Missouri, Columbia, MO 65211, U.S.A.*

\*E-mail: [mossinev@missouri.edu](mailto:mossinev@missouri.edu)

**Table S1.** Structures of Flavonoids

| Core                                                                              | Code#      | Trivial name                  | Substitutes                                      | Source                   |
|-----------------------------------------------------------------------------------|------------|-------------------------------|--------------------------------------------------|--------------------------|
| 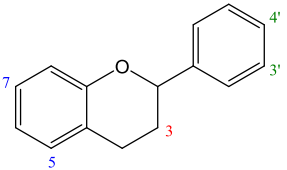 | 1          | (+)-catechin                  | 3,3',4',5,7-(OH) <sub>5</sub>                    | Sigma #C1251             |
|                                                                                   | 2          | (-)-epicatechin               | 3,3',4',5,7-(OH) <sub>5</sub>                    | Carl Roth KG #7293       |
|                                                                                   | 3          | ECG                           | 3-gallate,3',4',5,7-(OH) <sub>4</sub>            | Santa Cruz Bio #sc204739 |
|                                                                                   | 4          | (-)-gallocatechin             | 3,3',4',5',5,7-(OH) <sub>6</sub>                 | Sigma #G6657             |
|                                                                                   | 5          | (-)-epigallocatechin          | 3,3',4',5',5,7-(OH) <sub>6</sub>                 | Sigma #E3768             |
|                                                                                   | 6          | EGCG                          | 3-gallate,3',4',5',5,7-(OH) <sub>5</sub>         | Enzo LifeSci #270263     |
|  | 7          | (±)-naringenin                | 4',5,7-(OH) <sub>3</sub>                         | Sigma #N5893             |
|                                                                                   | 8          | naringin                      | 4',5-(OH) <sub>2</sub> ,7-O-Rha(1,2)Glc          | Sigma #N1376             |
|                                                                                   | 9          | eriodictyol                   | 3',4',5,7-(OH) <sub>4</sub>                      | Sigma #94258             |
|                                                                                   | 10         | hesperetin                    | 3',5,7-(OH) <sub>3</sub> , 4'-OMe                | TCI #H0721               |
|                                                                                   | 11         | hesperidin                    | 3',5-(OH) <sub>2</sub> , 4'-OMe, 7-O-Rha(1,6)Glc | AlfaAesar #J62126        |
|                                                                                   | 12         | taxifolin                     | 3,3',4',5,7-(OH) <sub>5</sub>                    | Sigma #T4512             |
|                                                                                   | 13         | silybin=silibinin             | 3,5,7-(OH) <sub>3</sub> ,3',4'-O,O-coniferyl     | Chem Cruz #sc202812      |
|  | 14         | flavone                       |                                                  | AlfaAesar #A13627        |
|                                                                                   | 15         | α-naphthoflavone              | 7,8-benzo                                        | TCI #B0056               |
|                                                                                   | 16         |                               | 7-OMe                                            | AlfaAesar #B24850        |
|                                                                                   | 17         |                               | 3',4'-(OH) <sub>2</sub>                          | AlfaAesar #L14161        |
|                                                                                   | 18         |                               | 4',5-(OH) <sub>2</sub>                           | AlfaAesar #H27650        |
|                                                                                   | 19         |                               | 4',7-(OMe) <sub>2</sub>                          | Indofine #D431           |
|                                                                                   | 20         |                               | 5,6-(OH) <sub>2</sub>                            | AlfaAesar #H27039        |
|                                                                                   | 21         | chrysin                       | 5,7-(OH) <sub>2</sub>                            | Acros #11032             |
|                                                                                   | 22         |                               | 7,8-(OH) <sub>2</sub>                            | Sigma #D5446             |
|                                                                                   | 23         |                               | 2',3',6-(OH) <sub>3</sub>                        | Indofine #22-324         |
|                                                                                   | 24         |                               | 3',7,8-(OH) <sub>3</sub>                         | Indofine #T411           |
|                                                                                   | 25         | apigenin                      | 4',5,7-(OH) <sub>3</sub>                         | Indofine #A002           |
|                                                                                   | 26         | acacetin                      | 4'-OMe, 5,7-(OH) <sub>2</sub>                    | TCI #A3013               |
|                                                                                   | 27         |                               | 4',7,8-(OH) <sub>3</sub>                         | Indofine #T412           |
|                                                                                   | 28         | baicalein                     | 5,6,7-(OH) <sub>3</sub>                          | Aldrich #455119          |
|                                                                                   | 29         | baicalin                      | 5,6-(OH) <sub>2</sub> , 7-O-Glc                  | Indofine #06-012         |
|                                                                                   | 30         | wogonin                       | 5,7-(OH) <sub>2</sub> , 8-OMe                    | Sigma #W0769             |
|                                                                                   | 31         | luteolin                      | 3',4',5,7-(OH) <sub>4</sub>                      | TSZ Chem #RRLO2          |
|                                                                                   | 32         | diosmin                       | 3',5-(OH) <sub>2</sub> , 4'-OMe, 7-O-Rha(1,6)Glc | AlfaAesar #J62073        |
|                                                                                   | 33         | neodiosmin                    | 3',5-(OH) <sub>2</sub> , 4'-OMe, 7-O-Rha(1,2)Glc | Indofine #021249         |
|                                                                                   | 34         | vitexin                       | 4',5,7-(OH) <sub>3</sub> , 8-C-Glc               | Adipogen #AGCN20425      |
|                                                                                   | 35         | tangeretin                    | 4',5,6,7,8-(OMe) <sub>5</sub>                    | Indofine #06-026         |
|                                                                                   | 36         | flavonol                      | 3-OH                                             | Eastman #6585            |
|                                                                                   | 37         |                               | 3-OH, 4'-OMe                                     | TCI #H1405               |
|                                                                                   | 38         | galangin                      | 3,5,7-(OH) <sub>3</sub>                          | AlfaAesar #L14223        |
|                                                                                   | 39         | fisetin                       | 3,3',4',7-(OH) <sub>4</sub>                      | Indofine #F002           |
| 40                                                                                | kaempferol | 3,4',5,7-(OH) <sub>4</sub>    | AlfaAesar #J60373                                |                          |
| 41                                                                                |            | 3,4',7,8-(OH) <sub>4</sub>    | AlfaAesar #H27348                                |                          |
| 42                                                                                | morin      | 3,2',4',5,7-(OH) <sub>5</sub> | Acros #35400                                     |                          |
| 43                                                                                | quercetin  | 3,3',4',5,7-(OH) <sub>5</sub> | Sigma #Q0125                                     |                          |

|                                                                                                       |    |                       |                                                               |                          |
|-------------------------------------------------------------------------------------------------------|----|-----------------------|---------------------------------------------------------------|--------------------------|
|                                                                                                       | 44 | rhamnetin             | 3,3',4',5'-(OH) <sub>4</sub> ,7-OMe                           | Santa Cruz Bio #sc236668 |
|                                                                                                       | 45 | quercetin-3-glucoside | 3-O-βGlc, 3',4',5,7-(OH) <sub>4</sub>                         | Sigma #17793             |
|                                                                                                       | 46 | quercitrin            | 3-O-αRha, 3',4',5,7-(OH) <sub>4</sub>                         | Sigma #Q3001             |
|                                                                                                       | 47 | rutin                 | 3-O-Rha(1,6)Glc 3',4',5,7-(OH) <sub>4</sub>                   | Sigma #R9000             |
|                                                                                                       | 48 | myricetin             | 3,3',4',5',5,7-(OH) <sub>6</sub>                              | Sigma #M6760             |
|                                                                                                       | 49 | myricitrin            | 3-O-αRha, 3',4',5',5,7-(OH) <sub>5</sub>                      | Aldrich #CDS006718       |
| Isoflavones<br>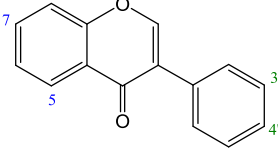      | 50 | daidzein              | 4',7-(OH) <sub>2</sub>                                        | Sigma #D7802             |
|                                                                                                       | 51 | daidzin               | 4',7-O-βGlc                                                   | TSZ Chem #RD02           |
|                                                                                                       | 52 | formononetin          | 4'-OMe, 7-OH                                                  | Aldrich #94334           |
|                                                                                                       | 53 |                       | 3',4',7-(OH) <sub>3</sub>                                     | Indofine #T415           |
|                                                                                                       | 54 | genistein             | 4',5,7-(OH) <sub>3</sub>                                      | Sigma #G6649             |
|                                                                                                       | 55 | genistin              | 4',5-(OH) <sub>2</sub> , 7-O-βGlc                             | TSZ Chem #RG01           |
|                                                                                                       | 56 | prunetin              | 4',5-(OH) <sub>2</sub> , 7-OMe                                | Sigma #82415             |
|                                                                                                       | 57 | biochanin A           | 4'-OMe, 5,7-(OH) <sub>2</sub>                                 | Sigma #D2016             |
|                                                                                                       | 58 | puerarin              | 4',7-(OH) <sub>2</sub> , 8-C-Glc                              | AlfaAesar #J66528        |
| Anthocyan(id)ins<br> | 59 | pelargonin            | 3,5-(O-βGlc) <sub>2</sub> , 4',7-(OH) <sub>2</sub>            | Sigma #52926             |
|                                                                                                       | 60 | cyanidin              | 3,3',4',5,7-(OH) <sub>5</sub>                                 | Sigma #79457             |
|                                                                                                       | 61 | keracyanin            | 3-O-Rha(1,6)Glc, 3',4',5,7-(OH) <sub>4</sub>                  | Sigma #36428             |
|                                                                                                       | 62 | cyanin                | 3,5-(O-βGlc) <sub>2</sub> , 3',4',7-(OH) <sub>3</sub>         | Sigma #94258             |
|                                                                                                       | 63 | delphinidin           | 3,3',4',5',5,7-(OH) <sub>6</sub>                              | Sigma #74397             |
|                                                                                                       | 64 | oenin                 | 3-O-βGlc, 3',5'-(OMe) <sub>2</sub> , 4',5,7-(OH) <sub>3</sub> | Carl Roth KG #4006       |

**Table S2.** Viability and transcriptional factor induction in BV-2 microglia-derived reporter cells treated with pathway activators/ inhibitors for 18 hours. SD values\* for the last 2 digits are given in parentheses.

| Inducer agent                             | Relative viability | Relative NF- $\kappa$ B fold | Relative AP-1 fold | Relative STAT1 fold | Relative STAT1/2 fold | Relative STAT3 fold | Relative Nrf2 fold | Relative MTF-1 fold |
|-------------------------------------------|--------------------|------------------------------|--------------------|---------------------|-----------------------|---------------------|--------------------|---------------------|
| 5 ng/mL TNF $\alpha$                      | 0.943 (51)         | 7.29 (20)                    | 0.903 (56)         | 2.24 (13)           | 1.83 (29)             | 0.485 (85)          | 1.62 (26)          | 0.457 (25)          |
| 100 ng/mL LPS                             | 1.01 (10)          | 29.8 (27)                    | 0.635 (82)         | 2.06 (29)           | 2.86 (39)             | 0.364 (57)          | 5.59 (71)          | 0.170 (38)          |
| 5 $\mu$ g/mL poly(I:C)                    | 0.852 (92)         | 4.40 (39)                    | 0.84 (14)          | 0.828 (88)          | 2.48 (61)             | 0.746 (90)          | 1.26 (17)          | 0.559 (39)          |
| 100 ng/mL PMA                             | 1.128 (66)         | 1.27 (29)                    | 1.95 (13)          | 0.74 (14)           | 1.28 (38)             | 0.600 (36)          | 3.81 (50)          | 0.80 (12)           |
| 500 nM CDDO-Me                            | 0.83 (11)          | 0.061 (06)                   | 0.231 (09)         | 0.139 (23)          | 2.18 (40)             | 0.743 (35)          | 27.2 (20)          | 0.323 (17)          |
| 10 $\mu$ M tBHQ                           | 0.88 (12)          | 0.492 (35)                   | 0.907 (57)         | 0.467 (34)          | 5.52 (94)             | 1.07 (21)           | 25.9 (15)          | 0.839 (91)          |
| 250 $\mu$ M H <sub>2</sub> O <sub>2</sub> | 1.020 (38)         | 0.818 (68)                   | 0.560 (43)         | 0.675 (71)          | 1.96 (31)             | 0.892 (36)          | 4.52 (33)          | 0.273 (10)          |
| 60 $\mu$ M Pyocyanin                      | 0.91 (10)          | 1.039 (77)                   | 0.97 (16)          | 1.04 (10)           | 2.88 (56)             | 2.74 (86)           | 31.5 (21)          | 0.993 (69)          |
| 20 $\mu$ M o-phenanthroline               | 0.88 (12)          | 0.604 (45)                   | 0.260 (22)         | 0.327 (17)          | 0.333 (43)            | 1.65 (18)           | 9.98 (67)          | 0.341 (22)          |
| 20 $\mu$ M ZnCl <sub>2</sub>              | 1.05 (17)          | 1.08 (12)                    | 0.990 (90)         | 0.808 (45)          | 0.958 (80)            | 0.879 (84)          | 3.94 (34)          | 5.35 (41)           |
| 10 ng/mL IFN- $\alpha$                    | 0.991 (32)         | 0.80 (11)                    | 1.01 (15)          | 6.26 (42)           | 6.65 (83)             | 2.11 (20)           | 0.773 (77)         | 1.033 (25)          |
| 5 ng/mL IFN- $\gamma$                     | 1.08 (10)          | 1.35 (29)                    | 0.465 (83)         | 193. (14)           | 10.6 (19)             | 14.02 (70)          | 0.162 (34)         | 0.093 (02)          |
| 10 ng/mL IL-6                             | 0.981 (51)         | 0.99 (10)                    | 0.872 (53)         | 1.09 (11)           | 0.91 (13)             | 9.30 (12)           | 0.784 (65)         | 1.01 (10)           |
| 25 ng/mL IL-4                             | 0.993 (44)         | 0.65 (11)                    | 1.02 (12)          | 0.498 (68)          | 0.740 (83)            | 1.26 (19)           | 0.828 (21)         | 1.054 (95)          |
| 200 nM Dasatinib                          | 0.75 (13)          | 0.436 (87)                   | 0.771 (80)         | 1.06 (13)           | 1.03 (23)             | 0.611 (40)          | 0.466 (40)         | 0.580 (55)          |
| 200 nM Ruxolitinib                        | 1.040 (74)         | 0.68 (13)                    | 0.986 (76)         | 0.097 (07)          | 0.958 (71)            | 0.430 (29)          | 0.818 (56)         | 0.989 (73)          |
| 50 $\mu$ M AG490                          | 1.10 (13)          | 0.052 (04)                   | 0.575 (65)         | 0.059 (05)          | 1.68 (19)             | 0.443 (83)          | 16.9 (24)          | 0.839 (62)          |

\*For viability, n=21; for specific TFs, n=3.

**Table S3.** TF induction fold and viability (GFP expression) in BV-2 microglia-based reporters for transcriptional activation of homodimer STAT1 and heterodimer STAT1/STAT2. The cells were treated with Mn(II) for 12 hours, n=3.

| Mn <sup>2+</sup> , μM | STAT1 |      |      |      | STAT1/STAT2 |      |      |      |
|-----------------------|-------|------|------|------|-------------|------|------|------|
|                       | Fold  | SD   | GFP  | SD   | Fold        | SD   | GFP  | SD   |
| 0                     | 1.05  | 0.12 | 0.98 | 0.03 | 0.98        | 0.02 | 0.99 | 0.06 |
| 21                    | 0.98  | 0.13 | 0.97 | 0.01 | 1.11        | 0.16 | 0.95 | 0.07 |
| 30                    | 0.98  | 0.15 | 0.95 | 0.06 | 1.14        | 0.12 | 0.95 | 0.03 |
| 42                    | 1.02  | 0.10 | 0.95 | 0.03 | 1.39        | 0.32 | 0.94 | 0.03 |
| 58                    | 1.10  | 0.11 | 1.02 | 0.05 | 1.65        | 0.36 | 0.98 | 0.02 |
| 82                    | 4.03  | 1.18 | 1.01 | 0.06 | 3.49        | 0.94 | 0.97 | 0.03 |
| 114                   | 16.13 | 1.89 | 1.02 | 0.04 | 17.5        | 2.0  | 0.99 | 0.02 |
| 160                   | 17.71 | 2.21 | 0.90 | 0.08 | 23.1        | 2.5  | 0.92 | 0.06 |

**Table S4.** Relative TF induction fold in BV-2 microglia-based reporters for transcriptional activation of STAT1 and STAT1/STAT2. The cells were treated with combinations of Mn(II) and IFNα for 12 hours, the data points are single measurements. For each row, the relative activation fold is calculated as TF activation fold divided by the respective TF activation fold in Mn(II)-only treated cells (Table S2). Values highlighted in yellow indicate weak synergistic interactions between Mn(II) and IFNα.

| IFNα, ng/mL           | 0                                    | 0.2  | 0.34 | 0.56 | 0.93 | 1.56 | 2.6  | 4.3  | 7.2  | 12   | 20   |
|-----------------------|--------------------------------------|------|------|------|------|------|------|------|------|------|------|
| Mn <sup>2+</sup> , μM | Relative STAT1 activation fold       |      |      |      |      |      |      |      |      |      |      |
| 0                     | 1.00                                 | 1.19 | 1.14 | 1.28 | 1.24 | 1.33 | 1.65 | 2.01 | 2.50 | 3.03 | 4.07 |
| 21                    | 1.00                                 | 1.21 | 0.92 | 1.07 | 1.12 | 1.56 | 1.51 | 1.97 | 2.55 | 3.20 | 4.10 |
| 30                    | 1.00                                 | 1.11 | 0.92 | 1.21 | 1.20 | 1.23 | 1.62 | 1.97 | 2.62 | 3.28 | 4.26 |
| 42                    | 1.00                                 | 0.93 | 1.10 | 1.23 | 1.09 | 1.25 | 1.50 | 2.01 | 2.83 | 3.89 | 4.16 |
| 58                    | 1.00                                 | 1.24 | 1.24 | 1.05 | 0.93 | 1.53 | 1.43 | 1.66 | 2.71 | 3.26 | 3.46 |
| 82                    | 1.00                                 | 1.03 | 0.99 | 1.37 | 1.47 | 1.56 | 1.60 | 1.66 | 2.03 | 3.51 | 3.14 |
| 114                   | 1.00                                 | 1.10 | 0.83 | 0.98 | 1.34 | 1.10 | 0.94 | 1.14 | 1.07 | 1.13 | 1.65 |
| 160                   | 1.00                                 | 0.90 | 0.91 | 1.05 | 0.95 | 1.23 | 1.04 | 1.30 | 1.23 | 1.45 | 1.09 |
|                       | Relative STAT1/STAT2 activation fold |      |      |      |      |      |      |      |      |      |      |
| 0                     | 1.00                                 | 1.67 | 2.45 | 2.42 | 2.74 | 3.49 | 3.86 | 4.31 | 5.33 | 6.07 | 6.29 |
| 21                    | 1.00                                 | 1.32 | 1.69 | 1.75 | 2.39 | 2.52 | 2.65 | 3.56 | 4.06 | 4.60 | 5.03 |
| 30                    | 1.00                                 | 1.29 | 1.53 | 1.85 | 2.20 | 2.31 | 2.74 | 3.03 | 3.89 | 3.89 | 4.85 |
| 42                    | 1.00                                 | 1.17 | 1.11 | 1.72 | 1.80 | 1.83 | 2.37 | 2.48 | 2.92 | 3.30 | 3.25 |
| 58                    | 1.00                                 | 2.36 | 1.90 | 2.25 | 2.33 | 3.04 | 3.30 | 3.20 | 4.82 | 4.80 | 4.47 |
| 82                    | 1.00                                 | 1.56 | 1.97 | 1.58 | 1.54 | 1.36 | 1.33 | 1.75 | 1.56 | 1.94 | 1.77 |
| 114                   | 1.00                                 | 1.07 | 1.24 | 0.91 | 1.01 | 0.90 | 0.93 | 1.18 | 1.14 | 1.01 | 0.91 |
| 160                   | 1.00                                 | 1.19 | 1.14 | 1.31 | 1.27 | 1.00 | 1.03 | 1.08 | 1.00 | 1.10 | 1.01 |

**Table S5.** Relative TF induction fold in BV-2 microglia-based reporters treated with combinations of Mn(II) and IFN $\gamma$  for 12 hours, the data points are single measurements. Values highlighted in yellow indicate weak synergistic interactions between Mn(II) and IFN $\gamma$ .

| IFN $\gamma$ , ng/mL                      | 0                                  | 0.004 | 0.008 | 0.016 | 0.032 | 0.063 | 0.125 | 0.25  | 0.5   | 1     | 2     |
|-------------------------------------------|------------------------------------|-------|-------|-------|-------|-------|-------|-------|-------|-------|-------|
| <b>Mn<sup>2+</sup>, <math>\mu</math>M</b> | <b>STAT1 activation fold</b>       |       |       |       |       |       |       |       |       |       |       |
| 0                                         | 1.00                               | 1.18  | 1.30  | 2.45  | 4.16  | 9.03  | 18.0  | 29.4  | 44.9  | 53.7  | 60.3  |
| 21                                        | 1.00                               | 1.08  | 1.23  | 1.98  | 4.20  | 8.75  | 14.7  | 27.7  | 39.2  | 49.1  | 55.1  |
| 30                                        | 1.00                               | 1.01  | 1.01  | 2.17  | 4.15  | 7.62  | 13.0  | 24.6  | 36.1  | 44.5  | 55.1  |
| 42                                        | 1.00                               | 1.32  | 1.28  | 1.92  | 3.45  | 8.01  | 13.5  | 23.8  | 38.9  | 38.6  | 49.9  |
| 58                                        | 1.00                               | 1.12  | 1.87  | 2.32  | 3.40  | 9.35  | 11.4  | 23.1  | 36.5  | 39.9  | 46.8  |
| 82                                        | 1.00                               | 1.46  | 1.62  | 3.34  | 4.12  | 5.68  | 7.52  | 10.8  | 16.2  | 18.2  | 24.7  |
| 114                                       | 1.00                               | 1.32  | 1.58  | 1.68  | 1.79  | 1.69  | 2.02  | 2.55  | 2.82  | 2.93  | 3.54  |
| 160                                       | 1.00                               | 1.08  | 1.10  | 1.12  | 1.12  | 1.28  | 1.63  | 2.01  | 1.92  | 2.20  | 1.86  |
|                                           | <b>STAT1/STAT2 activation fold</b> |       |       |       |       |       |       |       |       |       |       |
| 0                                         | 1.00                               | 1.28  | 1.59  | 2.70  | 4.16  | 7.59  | 13.46 | 16.69 | 22.25 | 23.65 | 22.42 |
| 21                                        | 1.00                               | 1.18  | 1.68  | 2.60  | 4.46  | 8.30  | 11.95 | 17.54 | 22.63 | 23.03 | 21.46 |
| 30                                        | 1.00                               | 1.38  | 1.65  | 2.91  | 4.77  | 6.94  | 12.46 | 17.29 | 21.78 | 20.20 | 21.34 |
| 42                                        | 1.00                               | 1.50  | 1.41  | 2.64  | 5.26  | 7.49  | 11.96 | 17.71 | 21.50 | 21.11 | 19.97 |
| 58                                        | 1.00                               | 1.20  | 1.65  | 2.13  | 3.17  | 5.03  | 7.76  | 10.56 | 15.65 | 12.33 | 11.48 |
| 82                                        | 1.00                               | 1.28  | 1.26  | 2.11  | 2.72  | 3.66  | 5.30  | 4.77  | 5.43  | 5.24  | 4.72  |
| 114                                       | 1.00                               | 0.98  | 1.22  | 1.32  | 1.65  | 1.57  | 1.76  | 1.87  | 1.64  | 1.27  | 1.16  |
| 160                                       | 1.00                               | 1.04  | 0.95  | 1.59  | 1.73  | 1.73  | 1.87  | 1.94  | 1.71  | 1.57  | 1.15  |

**Table S6.** Relative TF induction fold in BV-2 microglia-based reporters treated with combinations of Mn(II) and A $\beta_{25-35}$  for 12 hours, the data points are single measurements. Values highlighted in yellow or blue indicate, respectively, weak potentiation or inhibition of Mn(II) by A $\beta_{25-35}$ .

| A $\beta_{25-35}$ , $\mu$ M               | 0                           | 0.098 | 0.195 | 0.39 | 0.78 | 1.56 | 3.13 | 6.25 | 12.5 | 25   | 50   |
|-------------------------------------------|-----------------------------|-------|-------|------|------|------|------|------|------|------|------|
| <b>Mn<sup>2+</sup>, <math>\mu</math>M</b> | STAT1 activation fold       |       |       |      |      |      |      |      |      |      |      |
| 0                                         | 1.00                        | 0.98  | 0.96  | 1.00 | 1.06 | 1.21 | 1.09 | 0.81 | 0.98 | 0.95 | 0.99 |
| 21                                        | 1.00                        | 0.92  | 0.97  | 1.10 | 1.11 | 1.24 | 1.15 | 1.43 | 1.26 | 1.10 | 0.98 |
| 30                                        | 1.00                        | 0.86  | 1.18  | 0.70 | 0.83 | 0.89 | 0.95 | 1.11 | 1.03 | 1.11 | 1.04 |
| 42                                        | 1.00                        | 1.04  | 0.82  | 1.30 | 1.07 | 0.89 | 1.00 | 0.86 | 1.09 | 1.09 | 1.16 |
| 58                                        | 1.00                        | 1.25  | 1.03  | 1.11 | 1.16 | 1.06 | 0.96 | 0.95 | 1.09 | 1.11 | 1.14 |
| 82                                        | 1.00                        | 1.13  | 1.23  | 1.34 | 1.37 | 1.42 | 1.10 | 1.00 | 0.51 | 0.56 | 0.50 |
| 114                                       | 1.00                        | 0.93  | 1.11  | 1.04 | 1.30 | 1.12 | 1.28 | 1.29 | 1.14 | 0.79 | 0.79 |
| 160                                       | 1.00                        | 0.93  | 0.72  | 0.91 | 0.88 | 0.99 | 0.95 | 1.08 | 1.18 | 1.04 | 0.91 |
|                                           | STAT1/STAT2 activation fold |       |       |      |      |      |      |      |      |      |      |
| 0                                         | 1.00                        | 1.00  | 1.14  | 1.09 | 1.22 | 1.00 | 1.18 | 1.18 | 1.16 | 1.08 | 1.18 |
| 21                                        | 1.00                        | 0.89  | 0.99  | 0.99 | 0.95 | 0.95 | 1.15 | 1.00 | 1.24 | 0.92 | 0.92 |
| 30                                        | 1.00                        | 0.90  | 0.91  | 1.10 | 1.02 | 0.98 | 0.95 | 0.89 | 0.84 | 1.00 | 0.92 |
| 42                                        | 1.00                        | 0.91  | 0.75  | 0.96 | 1.04 | 1.14 | 0.89 | 0.94 | 1.31 | 1.10 | 1.80 |
| 58                                        | 1.00                        | 0.78  | 1.19  | 1.01 | 1.22 | 1.18 | 0.83 | 1.23 | 1.24 | 0.82 | 1.61 |
| 82                                        | 1.00                        | 0.85  | 0.91  | 1.34 | 0.89 | 1.04 | 1.10 | 0.81 | 1.48 | 1.03 | 1.43 |
| 114                                       | 1.00                        | 0.78  | 1.42  | 0.81 | 1.03 | 1.02 | 1.12 | 0.92 | 0.93 | 0.80 | 1.13 |
| 160                                       | 1.00                        | 0.93  | 0.97  | 1.00 | 1.24 | 1.15 | 1.14 | 0.94 | 0.80 | 0.64 | 0.84 |

**Table S7.** Relative TF induction fold in BV-2 microglia-based reporters treated with combinations of Mn(II) and poly(I:C) for 12 hours, the data points are single measurements.

| Poly(I:C), $\mu$ g/mL                     | 0                     | 2    | 8    | 32   | 128  | 512  | 0                           | 2    | 8    | 32   | 128  | 512  |
|-------------------------------------------|-----------------------|------|------|------|------|------|-----------------------------|------|------|------|------|------|
| <b>Mn<sup>2+</sup>, <math>\mu</math>M</b> | STAT1 activation fold |      |      |      |      |      | STAT1/STAT2 activation fold |      |      |      |      |      |
| 0                                         | 1.00                  | 13.2 | 15.9 | 17.1 | 17.3 | 18.2 | 1.00                        | 9.45 | 13.5 | 17.1 | 17.9 | 18.5 |
| 21                                        | 1.00                  | 9.33 | 13.3 | 11.4 | 12.6 | 13.5 | 1.00                        | 6.56 | 9.05 | 9.37 | 10.7 | 11.9 |
| 30                                        | 1.00                  | 10.6 | 11.7 | 12.0 | 14.3 | 15.6 | 1.00                        | 6.90 | 8.93 | 10.6 | 11.4 | 13.7 |
| 42                                        | 1.00                  | 7.99 | 9.70 | 9.59 | 11.7 | 11.4 | 1.00                        | 4.55 | 5.03 | 8.51 | 9.04 | 10.9 |
| 58                                        | 1.00                  | 8.90 | 10.0 | 11.6 | 12.2 | 14.6 | 1.00                        | 3.77 | 4.94 | 7.19 | 6.85 | 8.90 |
| 82                                        | 1.00                  | 2.58 | 2.24 | 1.95 | 2.10 | 2.33 | 1.00                        | 3.51 | 4.20 | 5.34 | 5.85 | 6.38 |
| 114                                       | 1.00                  | 1.20 | 1.18 | 1.12 | 1.03 | 1.19 | 1.00                        | 1.41 | 1.48 | 1.76 | 1.51 | 1.64 |
| 160                                       | 1.00                  | 1.06 | 1.08 | 1.00 | 1.08 | 1.07 | 1.00                        | 0.99 | 1.10 | 1.01 | 1.03 | 0.93 |

**Table S8.** Viability and transcriptional factor induction in BV-2 microglia-derived reporter cells treated with flavonoids for 18 hours. For viability, n=18; for specific TFs, n=3.

| Code # | name              | conc  | GFP fluorescence |       | NF-κB |       | AP-1  |       | STAT1 |       | STAT1/2 |       | STAT3 |       | Nrf2  |       |
|--------|-------------------|-------|------------------|-------|-------|-------|-------|-------|-------|-------|---------|-------|-------|-------|-------|-------|
|        |                   |       | Fold             | SD    | Fold  | SD    | Fold  | SD    | Fold  | SD    | Fold    | SD    | Fold  | SD    | Fold  | SD    |
| 1      | catechin          | 10 μM | 0.963            | 0.091 | 1.928 | 0.339 | 0.901 | 0.061 | 1.164 | 0.178 | 1.150   | 0.222 | 0.950 | 0.137 | 0.716 | 0.030 |
|        |                   | 50 μM | 1.050            | 0.069 | 1.476 | 0.127 | 0.894 | 0.103 | 1.276 | 0.188 | 0.951   | 0.108 | 1.199 | 0.023 | 0.655 | 0.057 |
| 2      | epicatechin       | 10 μM | 1.150            | 0.083 | 1.567 | 0.362 | 0.870 | 0.057 | 1.044 | 0.107 | 0.865   | 0.185 | 1.103 | 0.156 | 0.668 | 0.116 |
|        |                   | 50 μM | 1.113            | 0.084 | 1.214 | 0.370 | 0.865 | 0.055 | 1.104 | 0.112 | 0.960   | 0.120 | 1.392 | 0.036 | 0.653 | 0.028 |
| 3      | ECG               | 10 μM | 1.145            | 0.050 | 1.440 | 0.339 | 0.864 | 0.040 | 0.943 | 0.146 | 0.849   | 0.123 | 1.083 | 0.083 | 0.950 | 0.084 |
|        |                   | 50 μM | 1.197            | 0.124 | 1.384 | 0.188 | 0.773 | 0.034 | 0.982 | 0.067 | 1.176   | 0.147 | 1.004 | 0.067 | 1.371 | 0.035 |
| 4      | GC                | 10 μM | 1.154            | 0.085 | 1.247 | 0.297 | 0.939 | 0.046 | 1.086 | 0.173 | 0.898   | 0.147 | 1.116 | 0.187 | 0.837 | 0.063 |
|        |                   | 50 μM | 1.133            | 0.069 | 1.041 | 0.134 | 0.883 | 0.050 | 0.909 | 0.185 | 0.818   | 0.161 | 1.123 | 0.148 | 1.301 | 0.107 |
| 5      | EGC               | 10 μM | 1.131            | 0.085 | 0.975 | 0.140 | 0.943 | 0.085 | 1.074 | 0.126 | 0.899   | 0.165 | 1.135 | 0.141 | 0.670 | 0.037 |
|        |                   | 50 μM | 1.222            | 0.055 | 1.217 | 0.242 | 0.851 | 0.057 | 0.948 | 0.204 | 0.757   | 0.116 | 1.225 | 0.068 | 0.624 | 0.012 |
| 6      | EGCG              | 10 μM | 1.113            | 0.087 | 1.116 | 0.140 | 0.913 | 0.016 | 1.040 | 0.078 | 0.916   | 0.104 | 1.012 | 0.103 | 0.897 | 0.086 |
|        |                   | 50 μM | 1.156            | 0.078 | 0.943 | 0.206 | 0.799 | 0.021 | 1.104 | 0.228 | 0.864   | 0.134 | 1.000 | 0.153 | 1.311 | 0.196 |
| 7      | naringenin        | 10 μM | 1.084            | 0.055 | 1.306 | 0.352 | 1.121 | 0.124 | 1.188 | 0.220 | 1.055   | 0.044 | 1.054 | 0.125 | 1.145 | 0.247 |
|        |                   | 50 μM | 1.013            | 0.076 | 1.517 | 0.283 | 1.723 | 0.095 | 1.715 | 0.261 | 1.710   | 0.271 | 2.408 | 0.079 | 2.199 | 0.070 |
| 8      | naringin          | 10 μM | 0.937            | 0.115 | 1.388 | 0.142 | 1.077 | 0.041 | 0.894 | 0.131 | 0.739   | 0.105 | 0.922 | 0.153 | 1.090 | 0.104 |
|        |                   | 50 μM | 1.063            | 0.084 | 1.318 | 0.105 | 0.955 | 0.030 | 0.872 | 0.162 | 1.106   | 0.187 | 0.985 | 0.038 | 0.948 | 0.042 |
| 9      | eriodictyol       | 10 μM | 1.048            | 0.059 | 1.068 | 0.105 | 0.994 | 0.038 | 0.532 | 0.028 | 0.678   | 0.147 | 1.323 | 0.048 | 0.809 | 0.020 |
|        |                   | 50 μM | 0.899            | 0.069 | 1.677 | 0.219 | 1.266 | 0.034 | 0.289 | 0.115 | 1.199   | 0.251 | 0.926 | 0.040 | 2.138 | 0.118 |
| 10     | hesperetin        | 10 μM | 1.127            | 0.052 | 1.046 | 0.141 | 1.084 | 0.010 | 0.954 | 0.189 | 0.969   | 0.159 | 1.534 | 0.080 | 1.495 | 0.083 |
|        |                   | 50 μM | 1.068            | 0.067 | 3.176 | 0.406 | 2.733 | 0.063 | 1.810 | 0.193 | 2.484   | 0.425 | 3.227 | 0.126 | 3.344 | 0.240 |
| 11     | hesperidin        | 10 μM | 1.192            | 0.022 | 1.167 | 0.046 | 1.029 | 0.035 | 0.718 | 0.113 | 0.796   | 0.045 | 1.112 | 0.041 | 0.830 | 0.030 |
|        |                   | 50 μM | 0.997            | 0.057 | 1.225 | 0.157 | 1.108 | 0.046 | 1.351 | 0.239 | 1.149   | 0.107 | 1.172 | 0.076 | 1.024 | 0.060 |
| 12     | taxifolin         | 10 μM | 1.182            | 0.035 | 1.251 | 0.165 | 1.006 | 0.011 | 1.019 | 0.103 | 0.771   | 0.061 | 1.216 | 0.100 | 0.692 | 0.028 |
|        |                   | 50 μM | 1.046            | 0.067 | 1.028 | 0.107 | 1.124 | 0.052 | 1.055 | 0.162 | 1.139   | 0.084 | 1.399 | 0.190 | 0.740 | 0.029 |
| 13     | silybin=silibinin | 10 μM | 1.141            | 0.043 | 0.944 | 0.103 | 1.028 | 0.039 | 1.127 | 0.129 | 0.869   | 0.144 | 1.135 | 0.136 | 0.962 | 0.098 |
|        |                   | 50 μM | 1.040            | 0.036 | 0.868 | 0.182 | 1.165 | 0.028 | 0.846 | 0.064 | 0.944   | 0.055 | 0.943 | 0.071 | 1.304 | 0.081 |
| 14     | flavone           | 10 μM | 1.064            | 0.047 | 4.122 | 0.686 | 2.422 | 0.333 | 2.755 | 0.573 | 2.435   | 0.541 | 3.194 | 0.201 | 2.998 | 0.328 |
|        |                   | 50 μM | 0.902            | 0.072 | 6.091 | 1.068 | 2.061 | 0.148 | 1.458 | 0.228 | 1.774   | 0.438 | 3.864 | 0.321 | 5.723 | 0.878 |
| 15     | α-naphthoflavone  | 10 μM | 0.976            | 0.144 | 5.379 | 0.417 | 1.762 | 0.192 | 1.853 | 0.208 | 1.204   | 0.204 | 1.412 | 0.136 | 2.211 | 0.046 |
|        |                   | 50 μM | 0.299            | 0.071 | 3.529 | 0.614 | 0.478 | 0.056 | 0.210 | 0.161 | 0.665   | 0.171 | 0.297 | 0.160 | 5.788 | 0.305 |



|    |                       |            |       |       |       |       |       |       |       |       |       |       |       |       |        |       |
|----|-----------------------|------------|-------|-------|-------|-------|-------|-------|-------|-------|-------|-------|-------|-------|--------|-------|
| 16 | 7-OMe-flavone         | 10 $\mu$ M | 0.956 | 0.077 | 3.272 | 0.691 | 2.487 | 0.093 | 3.374 | 0.713 | 2.574 | 0.602 | 2.331 | 0.154 | 2.503  | 0.142 |
|    |                       | 50 $\mu$ M | 0.796 | 0.097 | 7.060 | 1.633 | 2.147 | 0.045 | 2.560 | 0.794 | 2.349 | 0.297 | 2.718 | 0.261 | 4.845  | 0.249 |
| 17 | 3',4'-(OH)2-flavone   | 10 $\mu$ M | 1.081 | 0.108 | 1.132 | 0.141 | 1.412 | 0.068 | 0.373 | 0.103 | 1.082 | 0.118 | 1.215 | 0.084 | 1.439  | 0.066 |
|    |                       | 50 $\mu$ M | 0.838 | 0.092 | 1.067 | 0.205 | 0.815 | 0.042 | 0.320 | 0.075 | 0.640 | 0.145 | 0.531 | 0.068 | 5.537  | 0.145 |
| 18 | 4',5-(OH)2-flavone    | 10 $\mu$ M | 1.055 | 0.131 | 2.027 | 0.177 | 2.180 | 0.216 | 1.377 | 0.225 | 1.568 | 0.030 | 2.141 | 0.067 | 3.775  | 0.111 |
|    |                       | 50 $\mu$ M | 0.862 | 0.115 | 2.666 | 0.642 | 1.430 | 0.036 | 0.534 | 0.063 | 1.131 | 0.116 | 0.972 | 0.110 | 7.635  | 0.694 |
| 19 | 4',7-(OMe)2-flavone   | 10 $\mu$ M | 1.058 | 0.113 | 2.416 | 0.302 | 2.521 | 0.014 | 1.874 | 0.011 | 2.299 | 0.454 | 2.425 | 0.276 | 3.022  | 0.364 |
|    |                       | 50 $\mu$ M | 0.646 | 0.162 | 6.612 | 1.008 | 2.189 | 0.422 | 1.022 | 0.113 | 1.403 | 0.087 | 1.336 | 0.205 | 5.522  | 0.736 |
| 20 | 5,6-(OH)2-flavone     | 10 $\mu$ M | 1.093 | 0.142 | 1.588 | 0.321 | 1.975 | 0.132 | 1.176 | 0.206 | 1.645 | 0.111 | 2.075 | 0.202 | 1.923  | 0.071 |
|    |                       | 50 $\mu$ M | 0.757 | 0.115 | 1.373 | 0.221 | 1.228 | 0.056 | 0.164 | 0.053 | 0.880 | 0.153 | 0.523 | 0.049 | 12.245 | 1.638 |
| 21 | chrysin               | 10 $\mu$ M | 1.073 | 0.134 | 1.894 | 0.215 | 2.419 | 0.004 | 2.531 | 0.213 | 3.015 | 0.586 | 2.711 | 0.160 | 2.828  | 0.196 |
|    |                       | 50 $\mu$ M | 1.007 | 0.136 | 3.167 | 0.702 | 2.526 | 0.319 | 2.026 | 0.087 | 2.993 | 0.110 | 2.375 | 0.125 | 3.649  | 0.383 |
| 22 | 7,8-(OH)2-flavone     | 10 $\mu$ M | 1.103 | 0.126 | 1.066 | 0.204 | 1.214 | 0.058 | 0.921 | 0.122 | 1.027 | 0.190 | 1.371 | 0.104 | 0.853  | 0.054 |
|    |                       | 50 $\mu$ M | 0.945 | 0.118 | 1.128 | 0.282 | 1.524 | 0.018 | 0.454 | 0.063 | 1.562 | 0.184 | 1.518 | 0.065 | 2.955  | 0.161 |
| 23 | 2',3',6-(OH)3-flavone | 10 $\mu$ M | 1.006 | 0.121 | 1.655 | 0.449 | 1.026 | 0.060 | 1.030 | 0.142 | 1.148 | 0.110 | 1.033 | 0.171 | 0.725  | 0.052 |
|    |                       | 50 $\mu$ M | 0.998 | 0.143 | 1.447 | 0.136 | 1.957 | 0.134 | 0.851 | 0.159 | 1.588 | 0.302 | 1.830 | 0.014 | 3.767  | 0.355 |
| 24 | 3',7,8-(OH)3-flavone  | 10 $\mu$ M | 1.074 | 0.077 | 0.898 | 0.151 | 0.995 | 0.030 | 0.860 | 0.153 | 0.868 | 0.147 | 1.103 | 0.067 | 0.674  | 0.029 |
|    |                       | 50 $\mu$ M | 0.969 | 0.072 | 0.993 | 0.109 | 1.012 | 0.037 | 0.367 | 0.027 | 0.758 | 0.217 | 0.985 | 0.060 | 1.226  | 0.139 |
| 25 | apigenin              | 10 $\mu$ M | 1.093 | 0.081 | 1.980 | 0.202 | 2.416 | 0.026 | 1.311 | 0.270 | 2.548 | 0.393 | 2.043 | 0.148 | 4.227  | 0.934 |
|    |                       | 50 $\mu$ M | 0.806 | 0.108 | 4.558 | 0.922 | 2.095 | 0.181 | 0.722 | 0.016 | 1.783 | 0.528 | 1.051 | 0.064 | 4.011  | 0.146 |
| 26 | acacetin              | 10 $\mu$ M | 1.151 | 0.115 | 2.494 | 0.100 | 3.231 | 0.232 | 2.165 | 0.219 | 2.715 | 0.293 | 2.826 | 0.365 | 3.836  | 0.246 |
|    |                       | 50 $\mu$ M | 0.842 | 0.116 | 4.751 | 0.444 | 3.438 | 0.406 | 1.196 | 0.138 | 3.031 | 0.290 | 1.973 | 0.047 | 5.508  | 0.293 |
| 27 | 4',7,8-(OH)3-flavone  | 10 $\mu$ M | 1.168 | 0.115 | 0.808 | 0.133 | 0.986 | 0.022 | 0.944 | 0.024 | 0.862 | 0.182 | 1.157 | 0.151 | 0.686  | 0.070 |
|    |                       | 50 $\mu$ M | 1.000 | 0.108 | 0.882 | 0.116 | 1.017 | 0.067 | 0.965 | 0.049 | 0.979 | 0.171 | 1.230 | 0.175 | 1.118  | 0.096 |
| 28 | baicalein             | 10 $\mu$ M | 1.120 | 0.136 | 0.769 | 0.194 | 1.316 | 0.094 | 1.096 | 0.243 | 1.308 | 0.199 | 1.281 | 0.130 | 0.691  | 0.090 |
|    |                       | 50 $\mu$ M | 1.014 | 0.127 | 1.146 | 0.170 | 1.788 | 0.095 | 0.811 | 0.164 | 1.337 | 0.332 | 1.600 | 0.147 | 2.319  | 0.146 |
| 29 | baicalin              | 10 $\mu$ M | 1.078 | 0.098 | 1.001 | 0.202 | 1.498 | 0.010 | 1.110 | 0.232 | 0.958 | 0.221 | 1.073 | 0.026 | 0.703  | 0.011 |
|    |                       | 50 $\mu$ M | 1.045 | 0.124 | 1.428 | 0.251 | 2.182 | 0.054 | 1.278 | 0.134 | 1.776 | 0.092 | 1.521 | 0.233 | 1.656  | 0.103 |
| 30 | wogonin               | 10 $\mu$ M | 1.077 | 0.083 | 0.815 | 0.132 | 0.903 | 0.057 | 0.677 | 0.212 | 0.819 | 0.023 | 1.010 | 0.075 | 1.058  | 0.123 |
|    |                       | 50 $\mu$ M | 0.785 | 0.111 | 1.604 | 0.213 | 1.470 | 0.081 | 0.876 | 0.119 | 1.617 | 0.242 | 1.639 | 0.108 | 2.327  | 0.379 |
| 31 | luteolin              | 10 $\mu$ M | 0.883 | 0.154 | 1.145 | 0.104 | 1.176 | 0.202 | 0.769 | 0.144 | 0.543 | 0.049 | 0.755 | 0.164 | 1.114  | 0.145 |
|    |                       | 50 $\mu$ M | 0.734 | 0.146 | 2.071 | 0.108 | 1.737 | 0.054 | 0.328 | 0.052 | 1.047 | 0.174 | 0.508 | 0.099 | 4.372  | 0.128 |
| 32 | diosmin               | 10 $\mu$ M | 1.052 | 0.136 | 0.964 | 0.165 | 0.941 | 0.042 | 1.061 | 0.073 | 0.395 | 0.138 | 0.953 | 0.166 | 0.911  | 0.134 |
|    |                       | 50 $\mu$ M | 1.187 | 0.151 | 0.585 | 0.197 | 0.912 | 0.053 | 0.840 | 0.052 | 1.089 | 0.202 | 0.825 | 0.172 | 1.139  | 0.054 |
| 33 | neodiosmin            | 10 $\mu$ M | 1.057 | 0.093 | 1.071 | 0.193 | 1.002 | 0.037 | 1.254 | 0.101 | 0.669 | 0.130 | 0.935 | 0.191 | 0.849  | 0.126 |

|    |                                    |       |       |       |       |       |       |       |       |       |       |       |       |       |        |       |
|----|------------------------------------|-------|-------|-------|-------|-------|-------|-------|-------|-------|-------|-------|-------|-------|--------|-------|
|    |                                    | 50 µM | 1.067 | 0.064 | 0.817 | 0.141 | 1.005 | 0.059 | 1.235 | 0.201 | 0.920 | 0.136 | 1.247 | 0.155 | 0.814  | 0.024 |
| 34 | vitexin                            | 10 µM | 1.117 | 0.080 | 0.888 | 0.136 | 0.951 | 0.060 | 1.429 | 0.340 | 0.722 | 0.113 | 1.055 | 0.088 | 0.826  | 0.031 |
|    |                                    | 50 µM | 1.094 | 0.091 | 1.216 | 0.487 | 0.988 | 0.103 | 1.262 | 0.342 | 0.853 | 0.067 | 1.257 | 0.202 | 0.812  | 0.035 |
| 35 | tangeretin                         | 10 µM | 1.073 | 0.073 | 0.701 | 0.309 | 1.214 | 0.111 | 1.600 | 0.236 | 1.101 | 0.371 | 1.257 | 0.160 | 1.433  | 0.201 |
|    |                                    | 50 µM | 0.954 | 0.054 | 1.749 | 0.358 | 1.440 | 0.067 | 0.898 | 0.046 | 0.944 | 0.473 | 1.587 | 0.147 | 2.767  | 0.362 |
| 36 | flavonol                           | 10 µM | 1.051 | 0.075 | 0.794 | 0.110 | 0.999 | 0.047 | 1.127 | 0.140 | 0.769 | 0.130 | 1.298 | 0.085 | 1.270  | 0.182 |
|    |                                    | 50 µM | 0.594 | 0.079 | 2.663 | 0.960 | 1.894 | 0.190 | 0.152 | 0.074 | 1.543 | 0.441 | 1.283 | 0.129 | 10.364 | 1.260 |
| 37 | 4'-OMe-flavonol                    | 10 µM | 1.103 | 0.057 | 1.307 | 0.545 | 1.019 | 0.045 | 1.202 | 0.100 | 0.663 | 0.140 | 1.022 | 0.017 | 1.299  | 0.609 |
|    |                                    | 50 µM | 1.005 | 0.097 | 0.987 | 0.354 | 1.187 | 0.019 | 2.005 | 0.185 | 1.153 | 0.219 | 1.295 | 0.094 | 1.818  | 0.175 |
| 38 | galangin                           | 10 µM | 0.981 | 0.088 | 0.990 | 0.131 | 0.874 | 0.087 | 1.161 | 0.290 | 0.826 | 0.109 | 1.028 | 0.044 | 1.882  | 0.230 |
|    |                                    | 50 µM | 0.973 | 0.118 | 2.095 | 0.345 | 2.374 | 0.172 | 1.389 | 0.259 | 1.722 | 0.182 | 2.421 | 0.112 | 7.381  | 0.068 |
| 39 | fisetin                            | 10 µM | 1.077 | 0.027 | 0.839 | 0.344 | 1.059 | 0.040 | 0.798 | 0.018 | 0.794 | 0.200 | 1.235 | 0.044 | 0.998  | 0.079 |
|    |                                    | 50 µM | 0.932 | 0.098 | 1.094 | 0.169 | 1.534 | 0.147 | 0.275 | 0.061 | 1.739 | 0.222 | 0.960 | 0.304 | 2.557  | 0.035 |
| 40 | kaempferol                         | 10 µM | 1.107 | 0.083 | 1.007 | 0.596 | 1.030 | 0.028 | 0.756 | 0.040 | 0.794 | 0.071 | 1.144 | 0.153 | 1.794  | 0.044 |
|    |                                    | 50 µM | 0.963 | 0.115 | 2.292 | 0.395 | 2.156 | 0.077 | 1.535 | 0.112 | 1.889 | 0.414 | 3.077 | 0.708 | 9.778  | 0.183 |
| 41 | 4',7,8-(OH) <sub>3</sub> -flavonol | 10 µM | 1.142 | 0.080 | 0.820 | 0.146 | 0.957 | 0.026 | 1.223 | 0.084 | 0.617 | 0.146 | 1.191 | 0.079 | 0.793  | 0.041 |
|    |                                    | 50 µM | 1.122 | 0.167 | 0.642 | 0.176 | 0.886 | 0.055 | 0.221 | 0.075 | 1.911 | 0.154 | 0.740 | 0.030 | 1.338  | 0.026 |
| 42 | morin                              | 10 µM | 1.150 | 0.059 | 0.723 | 0.173 | 0.994 | 0.057 | 1.027 | 0.070 | 0.588 | 0.130 | 1.214 | 0.038 | 0.823  | 0.022 |
|    |                                    | 50 µM | 1.028 | 0.061 | 0.892 | 0.095 | 1.174 | 0.101 | 1.326 | 0.184 | 0.862 | 0.237 | 1.427 | 0.125 | 1.098  | 0.061 |
| 43 | quercetin                          | 10 µM | 1.061 | 0.059 | 0.639 | 0.099 | 1.016 | 0.046 | 1.302 | 0.154 | 0.908 | 0.058 | 1.518 | 0.196 | 0.832  | 0.072 |
|    |                                    | 50 µM | 0.959 | 0.103 | 0.743 | 0.270 | 1.220 | 0.010 | 0.520 | 0.062 | 1.066 | 0.125 | 1.471 | 0.027 | 1.191  | 0.028 |
| 44 | rhamnetin                          | 10 µM | 1.146 | 0.146 | 0.447 | 0.147 | 0.849 | 0.028 | 1.149 | 0.355 | 0.642 | 0.156 | 1.230 | 0.020 | 0.922  | 0.058 |
|    |                                    | 50 µM | 1.253 | 0.300 | 0.319 | 0.038 | 0.483 | 0.150 | 0.308 | 0.124 | 0.608 | 0.146 | 1.227 | 0.100 | 1.836  | 0.093 |
| 45 | quercetin-3-glucoside              | 10 µM | 1.069 | 0.092 | 0.942 | 0.093 | 0.883 | 0.062 | 0.881 | 0.187 | 0.689 | 0.132 | 1.102 | 0.095 | 0.787  | 0.054 |
|    |                                    | 50 µM | 0.710 | 0.110 | 1.753 | 0.337 | 0.922 | 0.047 | 0.467 | 0.187 | 0.790 | 0.185 | 0.293 | 0.118 | 3.357  | 0.068 |
| 46 | quercitrin                         | 10 µM | 0.916 | 0.042 | 1.543 | 0.909 | 0.879 | 0.162 | 1.165 | 0.345 | 1.771 | 0.508 | 0.989 | 0.097 | 0.888  | 0.088 |
|    |                                    | 50 µM | 1.002 | 0.063 | 0.606 | 0.309 | 1.026 | 0.073 | 1.063 | 0.152 | 1.992 | 0.791 | 1.254 | 0.107 | 0.987  | 0.010 |
| 47 | rutin                              | 10 µM | 1.090 | 0.094 | 1.125 | 0.625 | 0.901 | 0.150 | 0.840 | 0.176 | 1.486 | 0.183 | 1.025 | 0.176 | 0.846  | 0.122 |
|    |                                    | 50 µM | 1.078 | 0.129 | 0.676 | 0.313 | 0.930 | 0.061 | 1.397 | 0.226 | 1.933 | 0.156 | 1.245 | 0.064 | 0.770  | 0.055 |
| 48 | myricetin                          | 10 µM | 1.048 | 0.072 | 0.684 | 0.541 | 0.866 | 0.104 | 0.903 | 0.116 | 1.650 | 0.061 | 1.060 | 0.130 | 0.849  | 0.092 |
|    |                                    | 50 µM | 1.130 | 0.099 | 0.266 | 0.222 | 0.757 | 0.032 | 0.811 | 0.618 | 1.214 | 0.210 | 1.036 | 0.055 | 0.850  | 0.049 |
| 49 | myricitrin                         | 10 µM | 1.092 | 0.093 | 0.816 | 0.149 | 0.965 | 0.092 | 0.904 | 0.303 | 1.692 | 0.297 | 1.138 | 0.170 | 0.790  | 0.021 |
|    |                                    | 50 µM | 1.117 | 0.107 | 0.516 | 0.201 | 0.851 | 0.143 | 1.115 | 0.447 | 1.323 | 0.611 | 1.262 | 0.058 | 0.733  | 0.050 |
| 50 | daidzein                           | 10 µM | 1.064 | 0.076 | 1.575 | 0.658 | 2.393 | 0.206 | 2.253 | 0.720 | 3.172 | 0.459 | 2.481 | 0.107 | 3.233  | 0.324 |
|    |                                    | 50 µM | 1.117 | 0.130 | 1.649 | 0.248 | 2.237 | 0.346 | 3.172 | 0.650 | 2.889 | 0.170 | 2.867 | 0.246 | 4.855  | 0.123 |

|    |                          |            |       |       |       |       |       |       |       |       |       |       |       |       |        |       |
|----|--------------------------|------------|-------|-------|-------|-------|-------|-------|-------|-------|-------|-------|-------|-------|--------|-------|
| 51 | daidzin                  | 10 $\mu$ M | 1.055 | 0.087 | 1.391 | 1.082 | 1.012 | 0.152 | 0.766 | 0.356 | 1.443 | 0.093 | 1.046 | 0.103 | 0.876  | 0.054 |
|    |                          | 50 $\mu$ M | 1.068 | 0.071 | 0.437 | 0.131 | 0.948 | 0.109 | 1.368 | 0.755 | 1.775 | 0.703 | 1.300 | 0.080 | 0.907  | 0.104 |
| 52 | formononetin             | 10 $\mu$ M | 1.062 | 0.081 | 2.156 | 0.607 | 3.526 | 0.482 | 3.627 | 0.769 | 3.812 | 1.459 | 4.207 | 0.316 | 4.014  | 0.672 |
|    |                          | 50 $\mu$ M | 0.998 | 0.077 | 2.603 | 0.614 | 2.839 | 0.045 | 2.277 | 1.197 | 4.583 | 2.426 | 3.430 | 0.395 | 3.735  | 0.082 |
| 53 | 3',4',7-(OH)3-isoflavone | 10 $\mu$ M | 0.842 | 0.132 | 0.887 | 0.903 | 1.390 | 0.038 | 0.619 | 0.484 | 0.920 | 0.544 | 1.078 | 0.042 | 1.698  | 0.180 |
|    |                          | 50 $\mu$ M | 0.903 | 0.107 | 1.344 | 0.159 | 1.427 | 0.133 | 0.449 | 0.342 | 2.668 | 0.649 | 1.262 | 0.013 | 10.482 | 1.323 |
| 54 | genistein                | 10 $\mu$ M | 1.098 | 0.103 | 2.169 | 0.470 | 2.180 | 0.216 | 1.943 | 0.410 | 2.911 | 0.417 | 2.325 | 0.071 | 3.624  | 0.289 |
|    |                          | 50 $\mu$ M | 0.850 | 0.083 | 2.445 | 1.034 | 2.098 | 0.267 | 1.536 | 0.776 | 3.235 | 0.478 | 1.563 | 0.104 | 5.859  | 0.099 |
| 55 | genistin                 | 10 $\mu$ M | 1.162 | 0.116 | 0.689 | 0.427 | 0.806 | 0.032 | 0.895 | 0.099 | 1.171 | 0.286 | 1.141 | 0.040 | 0.867  | 0.018 |
|    |                          | 50 $\mu$ M | 1.025 | 0.097 | 0.508 | 0.248 | 1.078 | 0.017 | 1.393 | 0.217 | 1.790 | 0.245 | 1.163 | 0.236 | 1.027  | 0.058 |
| 56 | prunetin                 | 10 $\mu$ M | 1.164 | 0.165 | 1.401 | 0.411 | 2.132 | 0.164 | 0.740 | 0.281 | 1.372 | 0.243 | 3.044 | 0.216 | 6.138  | 0.204 |
|    |                          | 50 $\mu$ M | 0.634 | 0.145 | 1.499 | 0.221 | 1.184 | 0.071 | 0.402 | 0.201 | 1.352 | 0.485 | 0.885 | 0.023 | 10.521 | 1.090 |
| 57 | biochanin A              | 10 $\mu$ M | 1.191 | 0.100 | 2.022 | 0.555 | 2.863 | 0.106 | 3.273 | 0.650 | 3.391 | 0.380 | 3.343 | 0.234 | 3.455  | 0.060 |
|    |                          | 50 $\mu$ M | 0.955 | 0.055 | 3.581 | 0.454 | 3.160 | 0.373 | 3.358 | 0.449 | 4.298 | 0.671 | 2.646 | 0.336 | 5.352  | 0.468 |
| 58 | puerarin                 | 10 $\mu$ M | 1.063 | 0.068 | 0.423 | 0.263 | 0.934 | 0.116 | 1.098 | 0.079 | 1.743 | 0.475 | 1.189 | 0.138 | 0.782  | 0.019 |
|    |                          | 50 $\mu$ M | 0.988 | 0.068 | 0.765 | 0.566 | 1.010 | 0.044 | 1.293 | 0.495 | 1.842 | 0.286 | 1.180 | 0.058 | 1.026  | 0.069 |
| 59 | pelargonin               | 10 $\mu$ M | 1.030 | 0.066 | 0.678 | 0.287 | 0.988 | 0.102 | 1.396 | 0.116 | 1.310 | 0.410 | 1.158 | 0.111 | 1.058  | 0.110 |
|    |                          | 50 $\mu$ M | 0.997 | 0.150 | 0.534 | 0.193 | 0.892 | 0.045 | 1.126 | 0.459 | 1.239 | 0.426 | 0.944 | 0.304 | 1.462  | 0.056 |
| 60 | cyanidin                 | 10 $\mu$ M | 1.083 | 0.139 | 0.439 | 0.134 | 0.851 | 0.169 | 0.912 | 0.315 | 0.779 | 0.117 | 0.973 | 0.118 | 1.046  | 0.085 |
|    |                          | 50 $\mu$ M | 0.933 | 0.118 | 0.991 | 0.156 | 0.847 | 0.060 | 0.633 | 0.706 | 0.594 | 0.218 | 0.851 | 0.045 | 1.214  | 0.192 |
| 61 | keracyanin               | 10 $\mu$ M | 0.988 | 0.063 | 1.700 | 0.179 | 0.942 | 0.182 | 0.888 | 0.333 | 1.293 | 0.498 | 1.012 | 0.032 | 0.827  | 0.125 |
|    |                          | 50 $\mu$ M | 1.015 | 0.083 | 1.493 | 0.527 | 0.893 | 0.159 | 1.295 | 0.489 | 1.336 | 0.478 | 1.149 | 0.027 | 0.796  | 0.062 |
| 62 | cyanin                   | 10 $\mu$ M | 1.167 | 0.124 | 0.390 | 0.247 | 0.950 | 0.087 | 0.873 | 0.273 | 1.035 | 0.043 | 1.137 | 0.129 | 0.719  | 0.090 |
|    |                          | 50 $\mu$ M | 1.136 | 0.091 | 1.988 | 1.835 | 0.855 | 0.031 | 1.245 | 0.108 | 1.182 | 0.241 | 1.202 | 0.120 | 0.757  | 0.056 |
| 63 | delphinidin              | 10 $\mu$ M | 1.126 | 0.099 | 0.824 | 0.726 | 0.927 | 0.016 | 0.996 | 0.443 | 1.164 | 0.104 | 1.039 | 0.057 | 0.939  | 0.096 |
|    |                          | 50 $\mu$ M | 1.225 | 0.136 | 0.911 | 0.135 | 0.871 | 0.046 | 0.451 | 0.067 | 1.267 | 0.079 | 0.917 | 0.135 | 1.147  | 0.009 |
| 64 | oenin                    | 10 $\mu$ M | 1.167 | 0.091 | 1.136 | 0.752 | 0.934 | 0.205 | 0.877 | 0.235 | 0.989 | 0.342 | 1.086 | 0.145 | 0.852  | 0.087 |
|    |                          | 50 $\mu$ M | 1.165 | 0.148 | 1.165 | 1.415 | 0.892 | 0.048 | 0.568 | 0.219 | 1.101 | 0.419 | 0.985 | 0.080 | 1.163  | 0.056 |

**Table S9.** Viability (GFP expression) and homodimer STAT1 transcriptional activation (luciferase activity) in BV-2 microglia treated with combinations of 50  $\mu$ M flavonoids and manganese (II) or interferon- $\gamma$  for 12 hours. For “none”, n=18; for specific flavonoids, n=3.

|        |                          | 100 $\mu$ M Mn(II) |       |                 |       | 200 $\mu$ M Mn(II) |       |                 |       | 1 ng/ mL IFN $\gamma$ |       |                 |        |
|--------|--------------------------|--------------------|-------|-----------------|-------|--------------------|-------|-----------------|-------|-----------------------|-------|-----------------|--------|
|        |                          | GFP fluoresc.      |       | Luciferase act. |       | GFP fluoresc.      |       | Luciferase act. |       | GFP fluoresc.         |       | Luciferase act. |        |
| Code # | flavonoid name           | Fold               | SD    | Fold            | SD    | Fold               | SD    | Fold            | SD    | Fold                  | SD    | Fold            | SD     |
|        | none                     | 0.752              | 0.120 | 5.653           | 0.660 | 0.553              | 0.160 | 4.121           | 0.482 | 0.984                 | 0.140 | 51.126          | 4.794  |
| 1      | catechin                 | 0.856              | 0.050 | 4.083           | 0.607 | 0.792              | 0.060 | 1.701           | 0.464 | 1.301                 | 0.153 | 56.213          | 2.005  |
| 2      | epicatechin              | 0.988              | 0.080 | 3.669           | 0.601 | 0.948              | 0.089 | 1.377           | 0.229 | 1.345                 | 0.112 | 53.948          | 1.049  |
| 3      | ECG                      | 0.927              | 0.194 | 2.152           | 0.518 | 0.929              | 0.102 | 0.238           | 0.211 | 1.129                 | 0.052 | 40.778          | 1.933  |
| 4      | GC                       | 0.957              | 0.074 | 4.063           | 0.339 | 0.981              | 0.067 | 1.973           | 0.311 | 1.254                 | 0.152 | 57.565          | 4.690  |
| 5      | EGC                      | 0.872              | 0.087 | 3.863           | 0.797 | 0.830              | 0.149 | 1.724           | 0.213 | 1.220                 | 0.165 | 53.450          | 3.240  |
| 6      | EGCG                     | 0.721              | 0.021 | 2.269           | 0.225 | 0.720              | 0.121 | 0.234           | 0.198 | 1.181                 | 0.092 | 42.559          | 2.960  |
| 7      | naringenin               | 0.637              | 0.068 | 8.323           | 1.433 | 0.612              | 0.102 | 3.805           | 0.347 | 1.014                 | 0.089 | 110.399         | 6.620  |
| 8      | naringin                 | 0.754              | 0.032 | 7.518           | 0.990 | 0.751              | 0.054 | 3.713           | 0.356 | 1.184                 | 0.046 | 57.920          | 6.245  |
| 9      | eriodictyol              | 0.819              | 0.091 | 2.872           | 0.598 | 0.805              | 0.062 | 0.848           | 0.273 | 0.980                 | 0.056 | 53.164          | 5.187  |
| 10     | hesperetin               | 0.890              | 0.138 | 16.866          | 1.360 | 0.848              | 0.066 | 10.580          | 1.821 | 1.141                 | 0.069 | 158.013         | 8.512  |
| 11     | hesperidin               | 0.799              | 0.040 | 4.576           | 0.995 | 0.835              | 0.079 | 2.494           | 0.284 | 1.053                 | 0.066 | 53.248          | 3.548  |
| 12     | taxifolin                | 0.844              | 0.121 | 3.691           | 0.314 | 0.833              | 0.114 | 1.925           | 0.157 | 1.204                 | 0.057 | 54.292          | 2.499  |
| 13     | silybin=silibinin        | 0.770              | 0.080 | 6.379           | 0.575 | 0.760              | 0.087 | 4.020           | 0.448 | 1.148                 | 0.090 | 60.306          | 3.676  |
| 14     | flavone                  | 0.668              | 0.073 | 12.363          | 2.586 | 0.693              | 0.181 | 7.220           | 3.007 | 0.856                 | 0.111 | 209.051         | 29.970 |
| 15     | $\alpha$ -naphthoflavone | 0.355              | 0.020 | 0.859           | 0.409 | 0.440              | 0.046 | 0.029           | 0.248 | 0.299                 | 0.011 | 39.255          | 1.668  |
| 16     | 7-OMe-flavone            | 0.772              | 0.057 | 6.550           | 1.339 | 0.875              | 0.029 | 4.607           | 0.953 | 0.961                 | 0.038 | 202.249         | 18.141 |
| 17     | 3',4'-(OH)2-flavone      | 1.005              | 0.144 | 0.460           | 0.087 | 1.183              | 0.082 | 0.089           | 0.045 | 0.809                 | 0.035 | 79.822          | 3.731  |
| 18     | 4',5-(OH)2-flavone       | 0.861              | 0.110 | 2.128           | 0.638 | 0.910              | 0.074 | 1.010           | 0.117 | 0.896                 | 0.085 | 166.653         | 19.632 |
| 19     | 4',7-(OMe)2-flavone      | 0.578              | 0.136 | 5.572           | 0.885 | 0.631              | 0.135 | 3.151           | 0.710 | 0.554                 | 0.073 | 75.587          | 2.292  |
| 20     | 5,6-(OH)2-flavone        | 0.665              | 0.033 | 3.520           | 0.811 | 0.786              | 0.167 | 1.280           | 0.185 | 0.837                 | 0.049 | 117.435         | 5.645  |
| 21     | chrysin                  | 0.668              | 0.092 | 6.261           | 1.043 | 0.638              | 0.163 | 3.029           | 1.032 | 0.993                 | 0.127 | 186.701         | 49.286 |
| 22     | 7,8-(OH)2-flavone        | 0.668              | 0.084 | 0.759           | 0.144 | 0.604              | 0.114 | 0.660           | 0.217 | 0.641                 | 0.055 | 70.261          | 3.137  |
| 23     | 2',3',6-(OH)3-flavone    | 0.861              | 0.013 | 3.228           | 0.330 | 0.773              | 0.044 | 1.268           | 0.318 | 0.839                 | 0.092 | 76.881          | 5.445  |
| 24     | 3',7,8-(OH)3-flavone     | 0.877              | 0.038 | 2.704           | 0.178 | 0.817              | 0.069 | 1.374           | 0.206 | 1.032                 | 0.106 | 47.496          | 3.666  |
| 25     | apigenin                 | 0.743              | 0.118 | 0.583           | 0.081 | 0.771              | 0.041 | 0.599           | 0.147 | 0.929                 | 0.092 | 129.081         | 8.511  |
| 26     | acacetin                 | 0.708              | 0.073 | 1.678           | 0.256 | 0.682              | 0.041 | 1.267           | 0.434 | 0.942                 | 0.064 | 141.409         | 6.379  |
| 27     | 4',7,8-(OH)3-flavone     | 0.929              | 0.040 | 4.238           | 0.571 | 0.788              | 0.127 | 2.234           | 0.413 | 1.097                 | 0.188 | 54.973          | 7.331  |
| 28     | baicalein                | 0.897              | 0.006 | 4.069           | 0.375 | 0.823              | 0.104 | 2.760           | 0.738 | 1.136                 | 0.200 | 75.723          | 5.058  |
| 29     | baicalin                 | 0.748              | 0.013 | 5.282           | 1.352 | 0.683              | 0.109 | 1.323           | 0.232 | 0.987                 | 0.053 | 88.439          | 4.596  |

|    |                          |       |       |        |       |       |       |        |       |       |       |         |        |
|----|--------------------------|-------|-------|--------|-------|-------|-------|--------|-------|-------|-------|---------|--------|
| 30 | wogonin                  | 0.540 | 0.056 | 5.445  | 1.401 | 0.353 | 0.042 | 3.676  | 0.511 | 0.848 | 0.028 | 104.378 | 10.153 |
| 31 | luteolin                 | 0.732 | 0.086 | 3.181  | 0.102 | 0.635 | 0.101 | 1.580  | 0.396 | 0.869 | 0.052 | 100.277 | 6.166  |
| 32 | diosmin                  | 0.896 | 0.056 | 4.464  | 0.094 | 0.729 | 0.055 | 2.385  | 0.684 | 0.989 | 0.156 | 45.931  | 0.888  |
| 33 | neodiosmin               | 0.813 | 0.122 | 5.841  | 0.841 | 0.732 | 0.020 | 3.107  | 0.514 | 0.983 | 0.011 | 56.763  | 5.346  |
| 34 | vitexin                  | 1.000 | 0.157 | 6.147  | 1.304 | 0.844 | 0.109 | 4.624  | 0.490 | 1.025 | 0.100 | 62.083  | 4.507  |
| 35 | tangeretin               | 0.741 | 0.059 | 4.984  | 1.312 | 0.757 | 0.162 | 3.868  | 0.375 | 0.859 | 0.062 | 92.284  | 5.722  |
| 36 | flavonol                 | 0.210 | 0.046 | 0.092  | 0.019 | 0.318 | 0.136 | 0.066  | 0.023 | 0.413 | 0.096 | 27.111  | 5.979  |
| 37 | 4'-OMe-flavonol          | 0.655 | 0.069 | 5.889  | 1.269 | 0.494 | 0.100 | 1.967  | 0.920 | 0.917 | 0.034 | 90.428  | 2.355  |
| 38 | galangin                 | 0.483 | 0.051 | 7.843  | 0.434 | 0.396 | 0.107 | 2.171  | 0.145 | 0.728 | 0.103 | 140.279 | 18.195 |
| 39 | fisetin                  | 0.686 | 0.051 | 4.444  | 0.959 | 0.608 | 0.081 | 0.917  | 0.086 | 1.050 | 0.074 | 63.036  | 2.637  |
| 40 | kaempferol               | 0.707 | 0.075 | 5.447  | 0.189 | 0.642 | 0.061 | 1.634  | 0.476 | 1.086 | 0.079 | 132.285 | 14.222 |
| 41 | 4',7,8-(OH)3-flavonol    | 1.719 | 0.205 | 2.768  | 0.294 | 1.635 | 0.077 | 1.543  | 0.061 | 2.001 | 0.085 | 30.898  | 2.984  |
| 42 | morin                    | 1.038 | 0.088 | 5.102  | 0.723 | 0.835 | 0.040 | 3.479  | 0.732 | 1.139 | 0.095 | 70.772  | 5.389  |
| 43 | quercetin                | 0.832 | 0.146 | 4.279  | 0.783 | 0.676 | 0.093 | 1.323  | 0.168 | 1.052 | 0.059 | 49.917  | 4.857  |
| 44 | rhamnetin                | 0.669 | 0.025 | 3.970  | 0.463 | 0.600 | 0.112 | 1.298  | 0.307 | 0.988 | 0.154 | 50.460  | 10.360 |
| 45 | quercetin-3-glucoside    | 0.734 | 0.031 | 3.684  | 0.365 | 0.632 | 0.136 | 0.851  | 0.274 | 0.853 | 0.031 | 51.159  | 2.807  |
| 46 | quercitrin               | 0.751 | 0.104 | 4.818  | 0.349 | 0.637 | 0.171 | 2.580  | 0.592 | 1.139 | 0.082 | 50.687  | 3.997  |
| 47 | rutin                    | 1.028 | 0.178 | 5.252  | 0.829 | 0.767 | 0.124 | 2.491  | 0.421 | 1.288 | 0.179 | 46.909  | 1.806  |
| 48 | myricetin                | 0.759 | 0.113 | 3.778  | 2.080 | 0.585 | 0.119 | 0.208  | 0.091 | 1.171 | 0.159 | 38.677  | 4.097  |
| 49 | myricitrin               | 0.765 | 0.140 | 5.207  | 0.286 | 0.617 | 0.132 | 3.098  | 0.376 | 1.204 | 0.153 | 55.185  | 3.925  |
| 50 | daidzein                 | 0.702 | 0.206 | 15.557 | 2.172 | 0.505 | 0.260 | 5.068  | 3.281 | 1.194 | 0.218 | 205.901 | 12.637 |
| 51 | daidzin                  | 0.547 | 0.063 | 6.674  | 1.854 | 0.405 | 0.062 | 4.074  | 0.048 | 1.046 | 0.080 | 57.214  | 5.224  |
| 52 | formononetin             | 0.829 | 0.122 | 22.732 | 2.277 | 0.674 | 0.151 | 16.432 | 1.198 | 1.189 | 0.097 | 200.346 | 11.406 |
| 53 | 3',4',7-(OH)3-isoflavone | 0.835 | 0.094 | 2.458  | 0.271 | 0.591 | 0.091 | 0.919  | 0.342 | 0.949 | 0.164 | 92.508  | 11.095 |
| 54 | genistein                | 0.630 | 0.117 | 6.138  | 1.303 | 0.505 | 0.199 | 3.852  | 0.788 | 1.113 | 0.133 | 175.713 | 12.662 |
| 55 | genistin                 | 0.725 | 0.108 | 5.540  | 1.157 | 0.522 | 0.183 | 4.105  | 1.311 | 1.151 | 0.166 | 64.532  | 5.262  |
| 56 | prunetin                 | 0.591 | 0.217 | 1.654  | 0.787 | 0.628 | 0.239 | 0.979  | 0.558 | 0.687 | 0.117 | 80.473  | 11.042 |
| 57 | biochanin A              | 0.450 | 0.044 | 6.127  | 1.804 | 0.417 | 0.082 | 5.572  | 1.635 | 0.922 | 0.106 | 199.312 | 27.926 |
| 58 | puerarin                 | 0.901 | 0.016 | 6.389  | 0.347 | 0.651 | 0.046 | 5.195  | 0.215 | 0.965 | 0.007 | 54.700  | 1.266  |
| 59 | pelargonin               | 0.878 | 0.028 | 7.369  | 0.195 | 0.642 | 0.008 | 4.555  | 0.241 | 0.988 | 0.030 | 53.825  | 1.835  |
| 60 | cyanidin                 | 0.891 | 0.031 | 6.453  | 0.270 | 0.614 | 0.058 | 4.842  | 0.294 | 0.967 | 0.010 | 56.344  | 2.008  |
| 61 | keracyanin               | 0.816 | 0.073 | 6.479  | 0.142 | 0.591 | 0.033 | 4.937  | 0.397 | 0.962 | 0.027 | 56.197  | 1.830  |
| 62 | cyanin                   | 0.839 | 0.049 | 5.414  | 0.448 | 0.595 | 0.052 | 5.515  | 0.031 | 0.952 | 0.045 | 54.366  | 3.325  |
| 63 | delphinidin              | 0.851 | 0.058 | 5.056  | 0.250 | 0.611 | 0.052 | 4.073  | 0.397 | 0.904 | 0.087 | 56.223  | 4.288  |
| 64 | oenin                    | 0.861 | 0.073 | 5.093  | 0.530 | 0.614 | 0.043 | 4.144  | 0.831 | 0.869 | 0.187 | 60.082  | 2.239  |

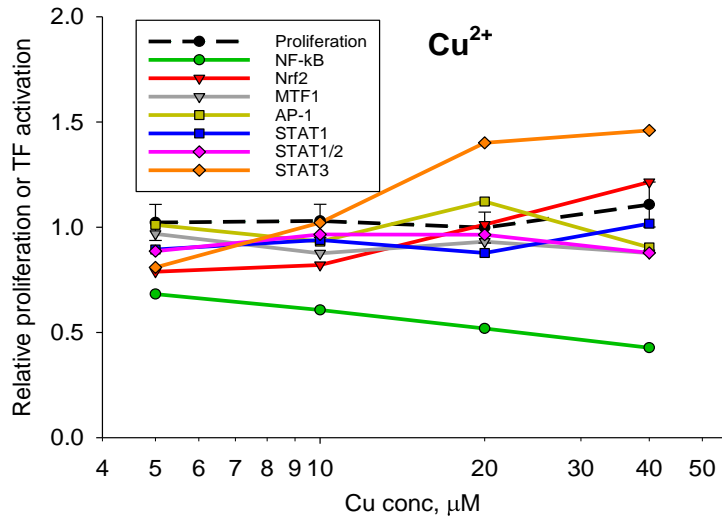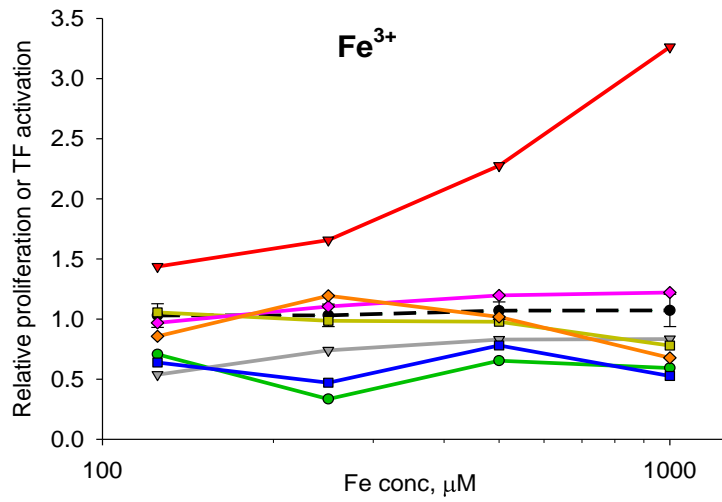

**Figure S1.** Proliferation rates and transcriptional responses of BV-2 microglia reporter cells treated with copper (II) chloride or iron (III) citrate for 14 hours. Color coding is the same for both panels. For proliferation rates, error bars are SDs, n = 7. For TF activation folds, n = 1.

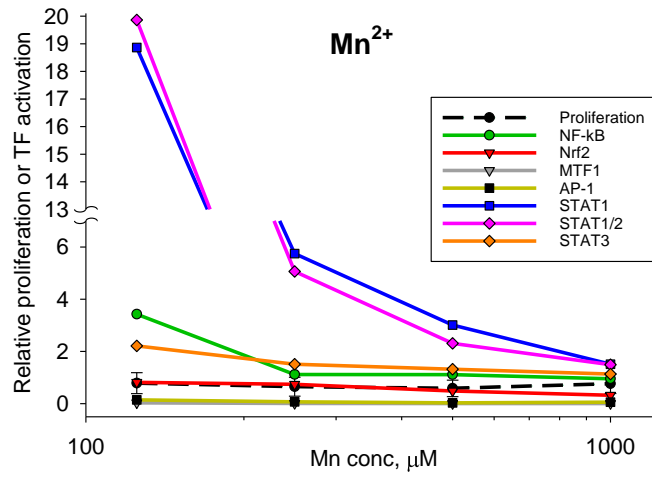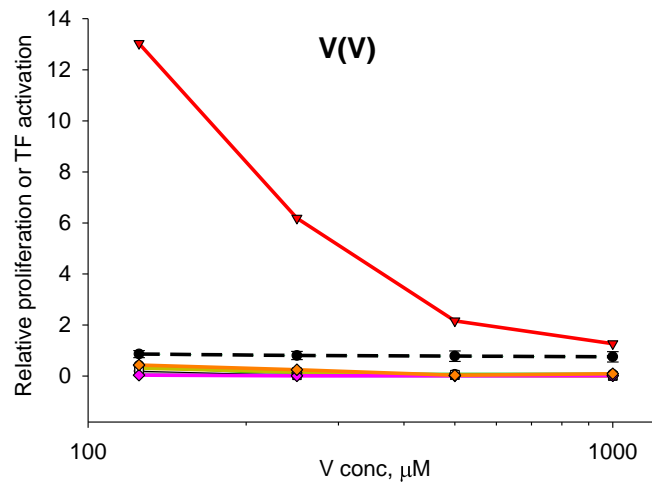

**Figure S2.** Proliferation rates and transcriptional responses of BV-2 microglia reporter cells treated with manganese (II) chloride or sodium orthovanadate for 14 hours. Color coding is the same for both panels. For proliferation rates, error bars are SDs,  $n = 7$ . For TF activation folds,  $n = 1$ .

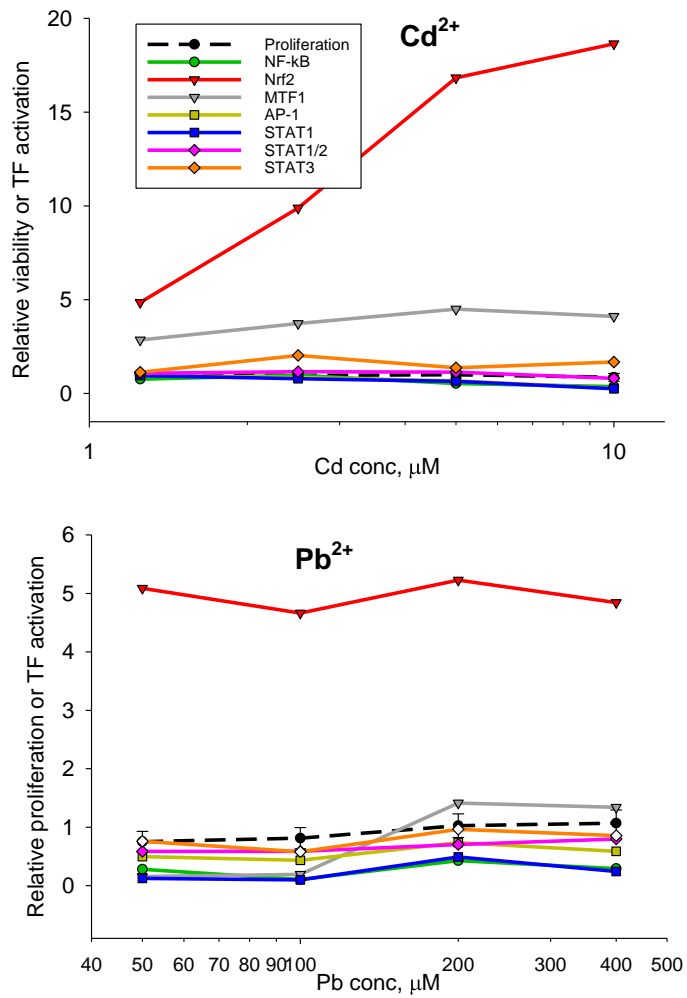

**Figure S3. Proliferation rates and transcriptional responses of BV-2 microglia reporter cells treated with cadmium chloride or lead (II) acetate for 14 hours. Color coding is the same for both panels. For proliferation rates, error bars are SDs, n = 7. For TF activation folds, n = 1.**



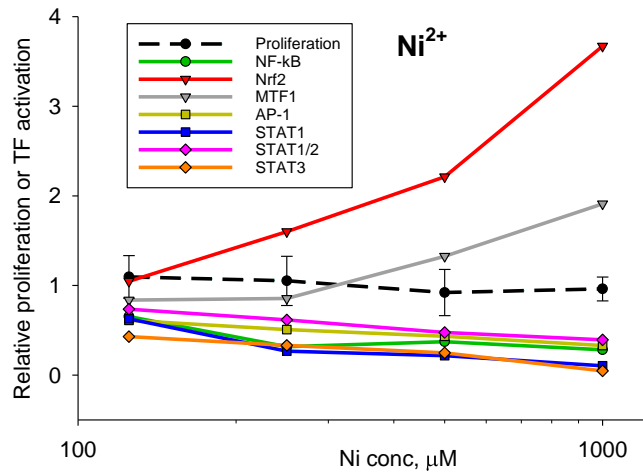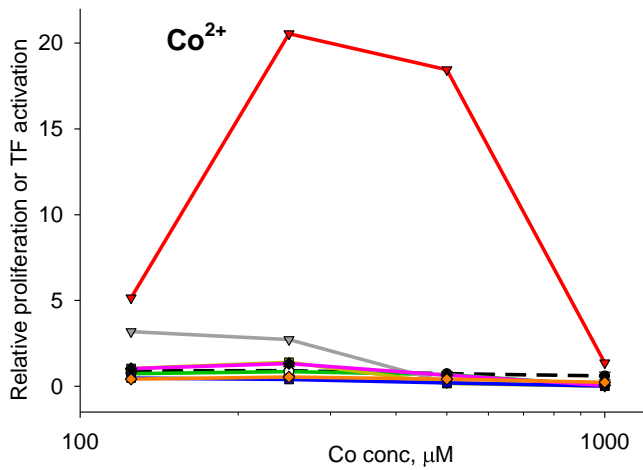

**Figure S4.** Proliferation rates and transcriptional responses of BV-2 microglia reporter cells treated with nickel chloride or cobalt (II) chloride for 14 hours. Color coding is the same for both panels. For proliferation rates, error bars are SDs, n = 7. For TF activation folds, n = 1.

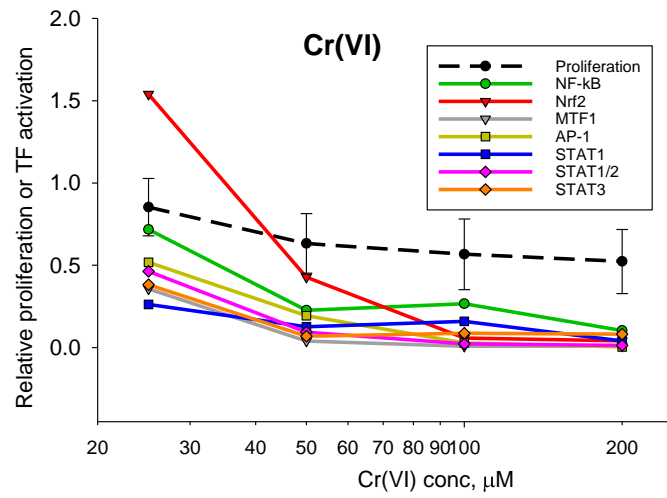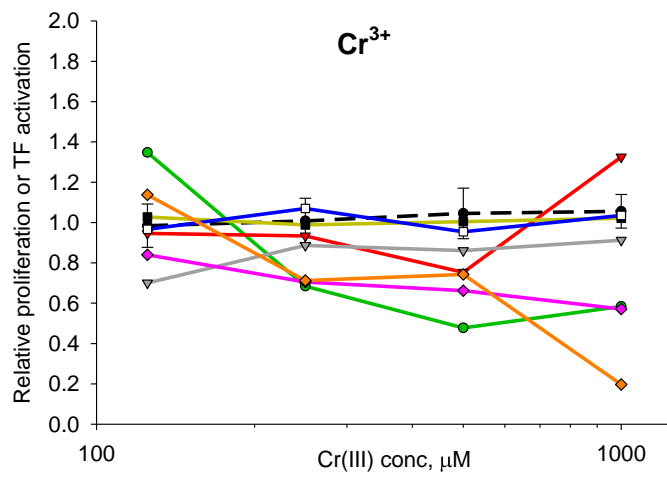

**Figure S5.** Proliferation rates and transcriptional responses of BV-2 microglia reporter cells treated with potassium chromate or chromium (III) chloride for 14 hours. Color coding is the same for both panels. For proliferation rates, error bars are SDs,  $n = 7$ . For TF activation folds,  $n = 1$ .

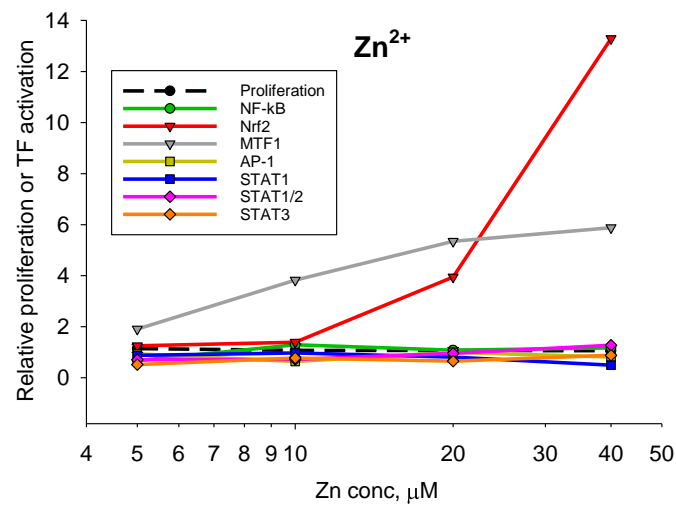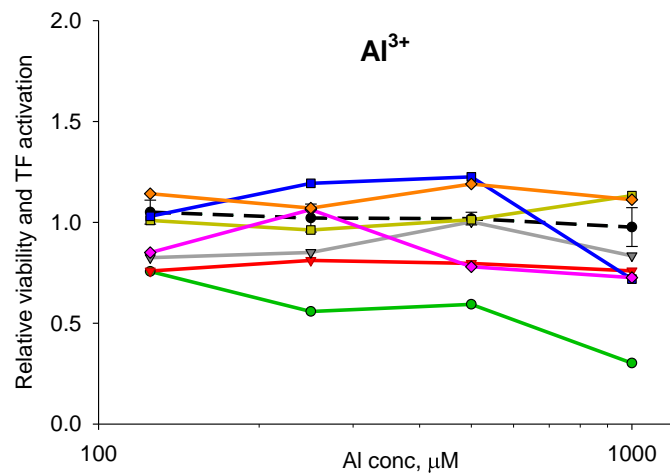

**Figure S6.** Proliferation rates and transcriptional responses of BV-2 microglia reporter cells treated with zinc chloride or aluminum chloride for 14 hours. Color coding is the same for both panels. For proliferation rates, error bars are SDs,  $n = 7$ . For TF activation folds,  $n = 1$ .

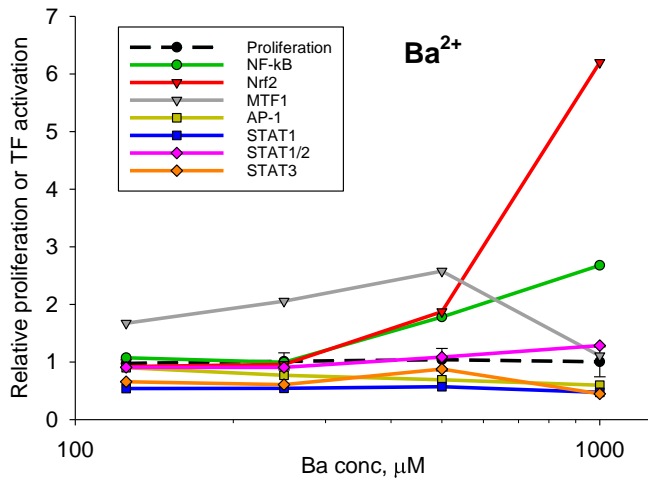

**Figure S7. Proliferation rates and transcriptional responses of BV-2 microglia reporter cells treated with barium chloride for 14 hours. For proliferation rates, error bars are SDs, n = 7. For TF activation folds, n = 1.**
